**TITLE: Screening for Poverty And Related Social determinants to improve Knowledge of and links to resources (SPARK): development and cognitive testing of a tool for primary care**

Itunuoluwa Adekoya, MSc, Alannah Delahunty-Pike, Msc, Dana Howse PhD, Leanne Kosowan MSc, Zita Seshie PhD, Eunice Abaga, Jane Cooney, Marjeiry Robinson, Dorothy Senior, Alexander Zsager, Kris Aubrey-Bassler MD CCFP MSc, Mandi Irwin, Lois Jackson PhD, Alan Katz MBChB, MSc CCFP, Emily Marshall, Nazeem Muhajarine AB MSc PhD, Cory Neudorf MD FRCPC MHSc, Andrew D. Pinto MD CCFP FRCPC MSc

**Withdrawal statement:**

"The authors have withdrawn this manuscript owing to one of the authors, Lynn Thompson, no longer standing by her participation in this work. Therefore, the authors do not wish this work to be cited as reference for the project. The remaining authors have since published the work in *BMC Primary Care*: **Adekoya, I., Delahunty-Pike, A., Howse, D. et al. Screening for poverty and related social determinants to improve knowledge of and links to resources (SPARK): development and cognitive testing of a tool for primary care. *BMC Prim. Care* 24, 247 (2023). <https://doi.org/10.1186/s12875-023-02173-8>. If you have any questions, please contact the corresponding author."**
